# Supplementary material for: Increased intracellular pH is necessary for adult epithelial and embryonic stem cell differentiation
Source: PubMed Central journal article supplement — J Cell Biol. 2016 Nov 7;215(3):345–55. doi: 10.1083/jcb.201606042 (PMC5100294; doi:10.1083/jcb.201606042), 2016-11-07
Supplement: JCB_201606042_sm.pdf [file JCB_201606042_sm.pdf]

Ulmschneider et al., <https://doi.org/10.1083/jcb.201606042>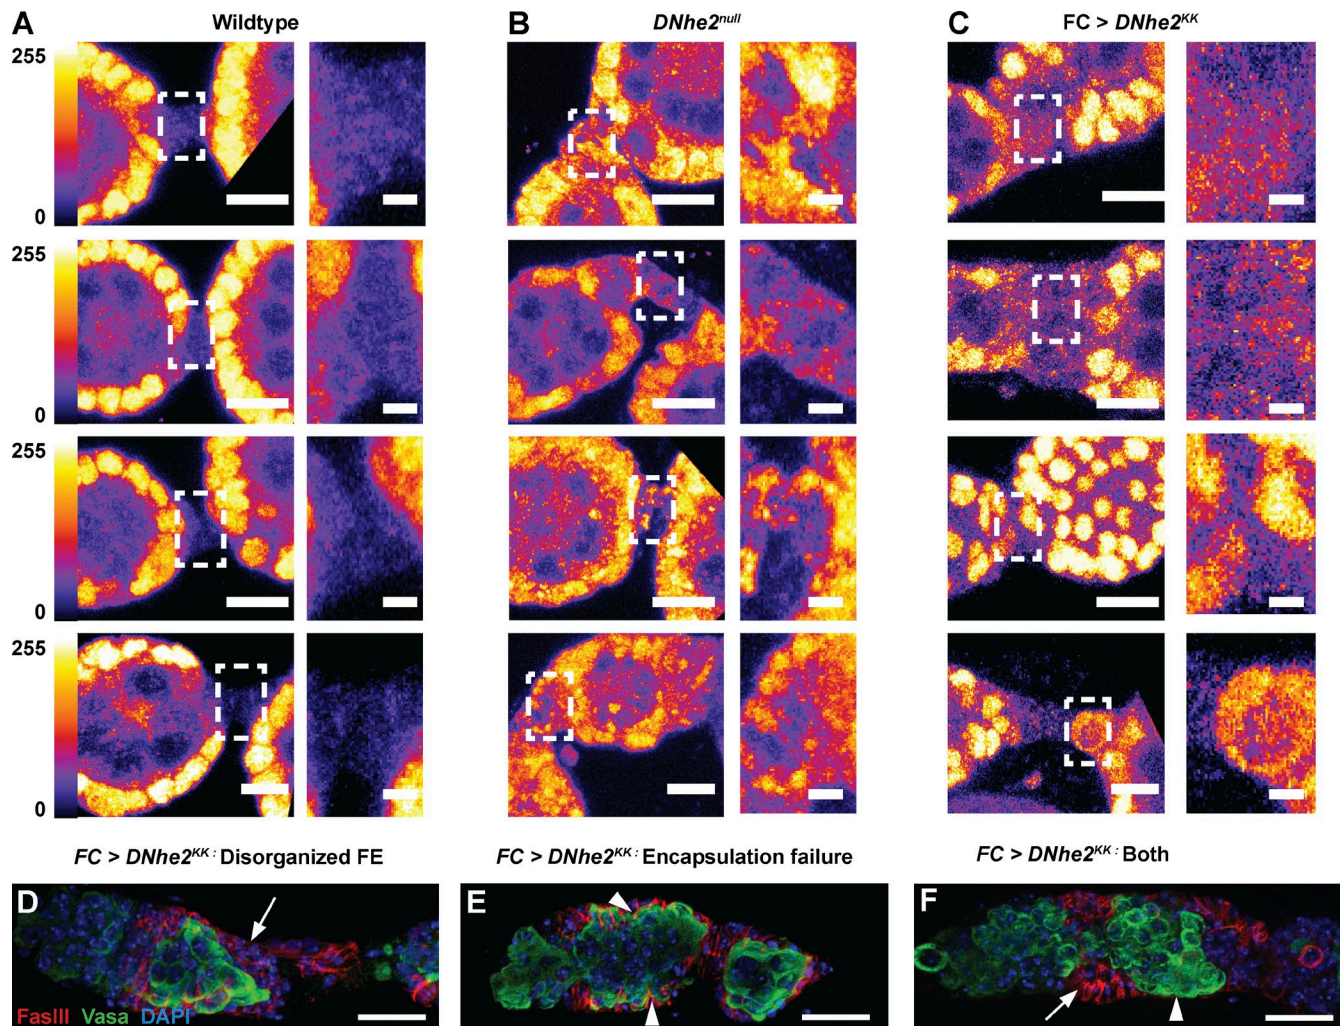

Figure S1. **Additional images of the Eya channel for images stained with Cas and Eya.** (A–C) Additional examples of Eya staining in the stalk cells of ovarioles from wild-type (A), *DNhe2<sup>null</sup>* (B), and *FC-Gal4>UAS-DNhe2<sup>KK RNAi</sup>* (C) flies. The Eya channel has been pseudocolored to reflect intensity values. Eya is misexpressed and enriched in the cytoplasm of stalk cells *DNhe2<sup>null</sup>* and *DNhe2<sup>KK RNAi</sup>* expressing ovarioles. Boxed regions are enlarged to the right of each image. Bars: (main images) 10  $\mu$ m; (insets) 2  $\mu$ m. (D–F) Expression of *DNhe2<sup>KK RNAi</sup>* with FC-Gal4 causes morphological defects in the germarium that are similar to the phenotypes observed in *DNhe2<sup>null</sup>* germaria, including a disorganized follicle epithelium (arrow; D), encapsulation defects (arrowheads; E), and both a disorganized follicle epithelium (arrow) and encapsulation defects (arrowhead; F). Bars, 20  $\mu$ m.

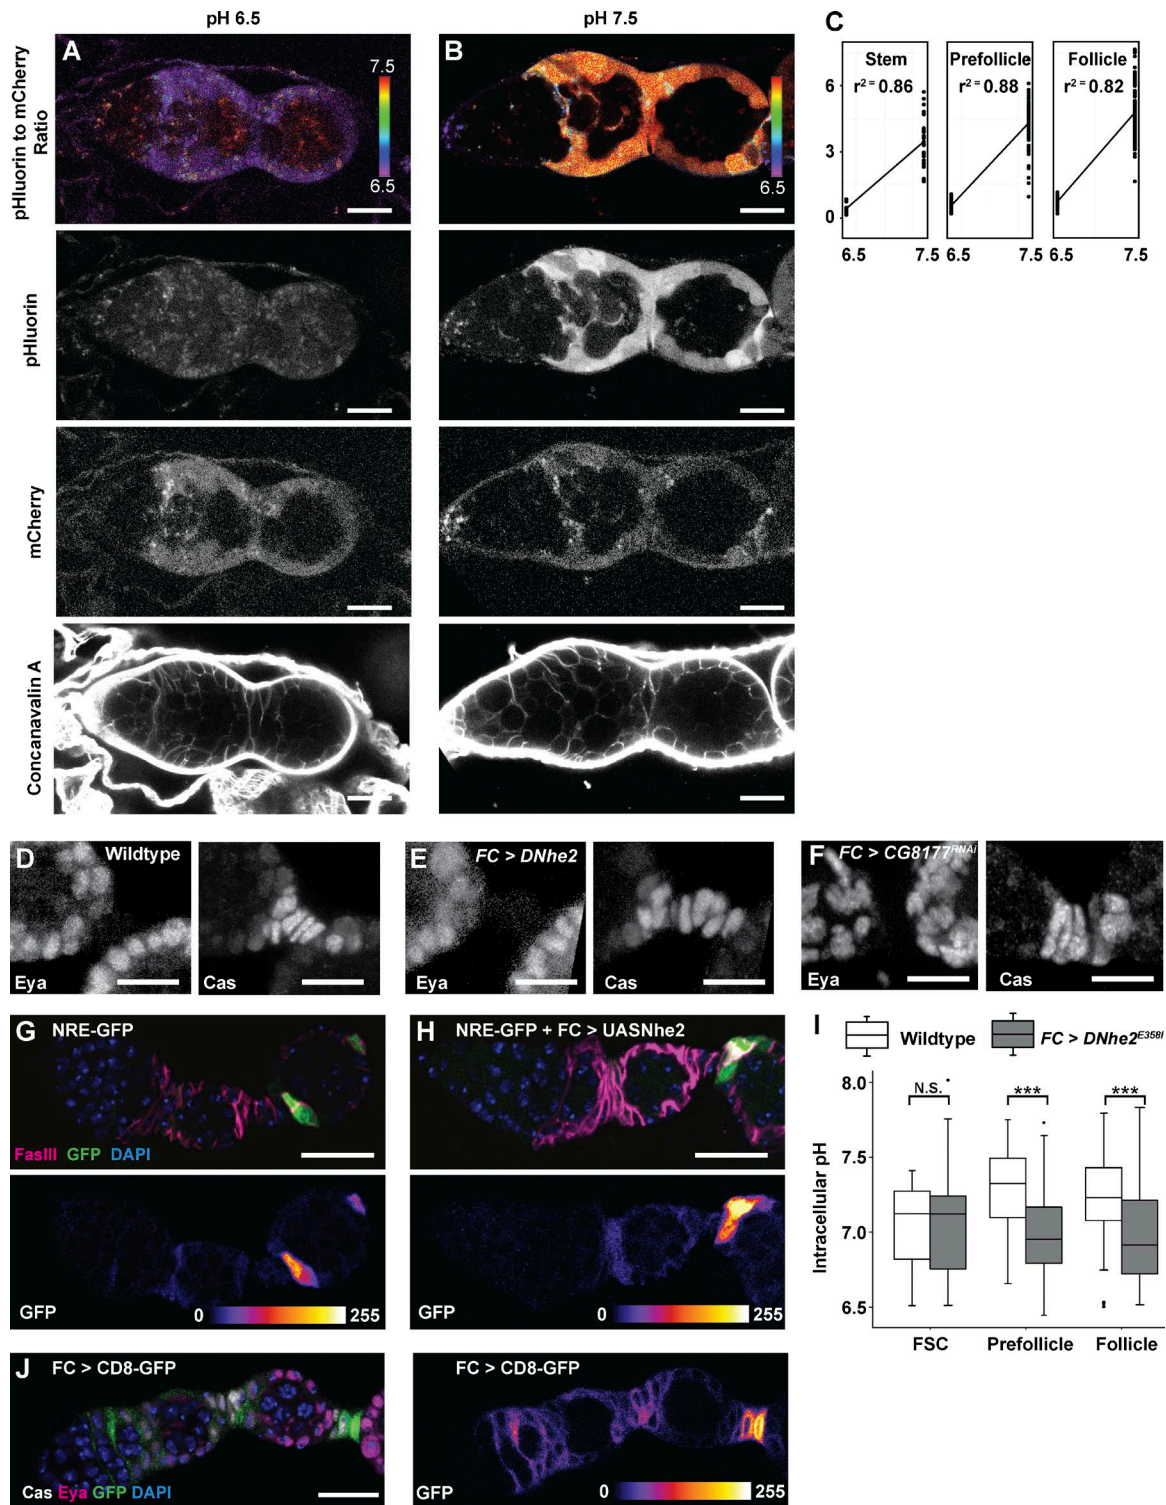

Figure S2. Example images of calibration curves, example calibrations for quantitative pH imaging, and images of the Notch reporter, NRE-GFP, as well as quantitative pH measurements for *FC > DNhe2<sup>E358I</sup>*. (A and B) Germaria in nigericin buffer with pH<sub>i</sub> equilibrated to pH 6.5 (A) or 7.5 (B) units. In these conditions, the ratio of pHluorin fluorescence to mCherry fluorescence became uniform throughout the germaria, with low pHluorin fluorescence intensity at a pH of 6.5 and high pHluorin fluorescence intensity at a pH of 7.5. The pseudocoloring indicates the ratio of the fluorescence intensities of pHluorin to mCherry, which correlates with pH<sub>i</sub>. Colored bars indicate pH<sub>i</sub>. For pH<sub>i</sub> measurements, germaria were stained with concanavalin A conjugated to Alexa Fluor 647 (bottom panels in A and B) to identify cell boundaries so each cell could be accurately measured independently. (C) Representative calibration curves for a typical experiment, in this case wild-type FSC clones with mCherry::pHluorin.  $r^2$  values are indicated. (D–F) Single Eya (D–F, left) and Cas (D–F, right) channels corresponding to the insets in Fig. 3 (C–E, right). (G and H) Germaria stained for FasIII and GFP with the Notch pathway reporter, NRE-GFP, alone (G) or in combination with *DNhe2* overexpression (H). Pseudocolored image reflecting the intensity of the GFP channel is shown in G and H (bottom). (I) pH<sub>i</sub> does not increase when a mutationally inactive *DNhe2<sup>E358I</sup>* is overexpressed.  $n = 19$ – $25$  germaria;  $n = 4$  independent replicates. \*\*\*,  $P < 0.001$ . (J) A germarium stained with Cas (gray), GFP (green), Eya (magenta), and DAPI (blue) with *FC-Gal4* driving expression of *CD8::GFP*. Pseudocoloring in J (right) shows uniform intensity of the GFP channel in pFCs and FCs. Bars: (A, B, G, H, and J) 20  $\mu\text{m}$ ; (D–F) 10  $\mu\text{m}$ .

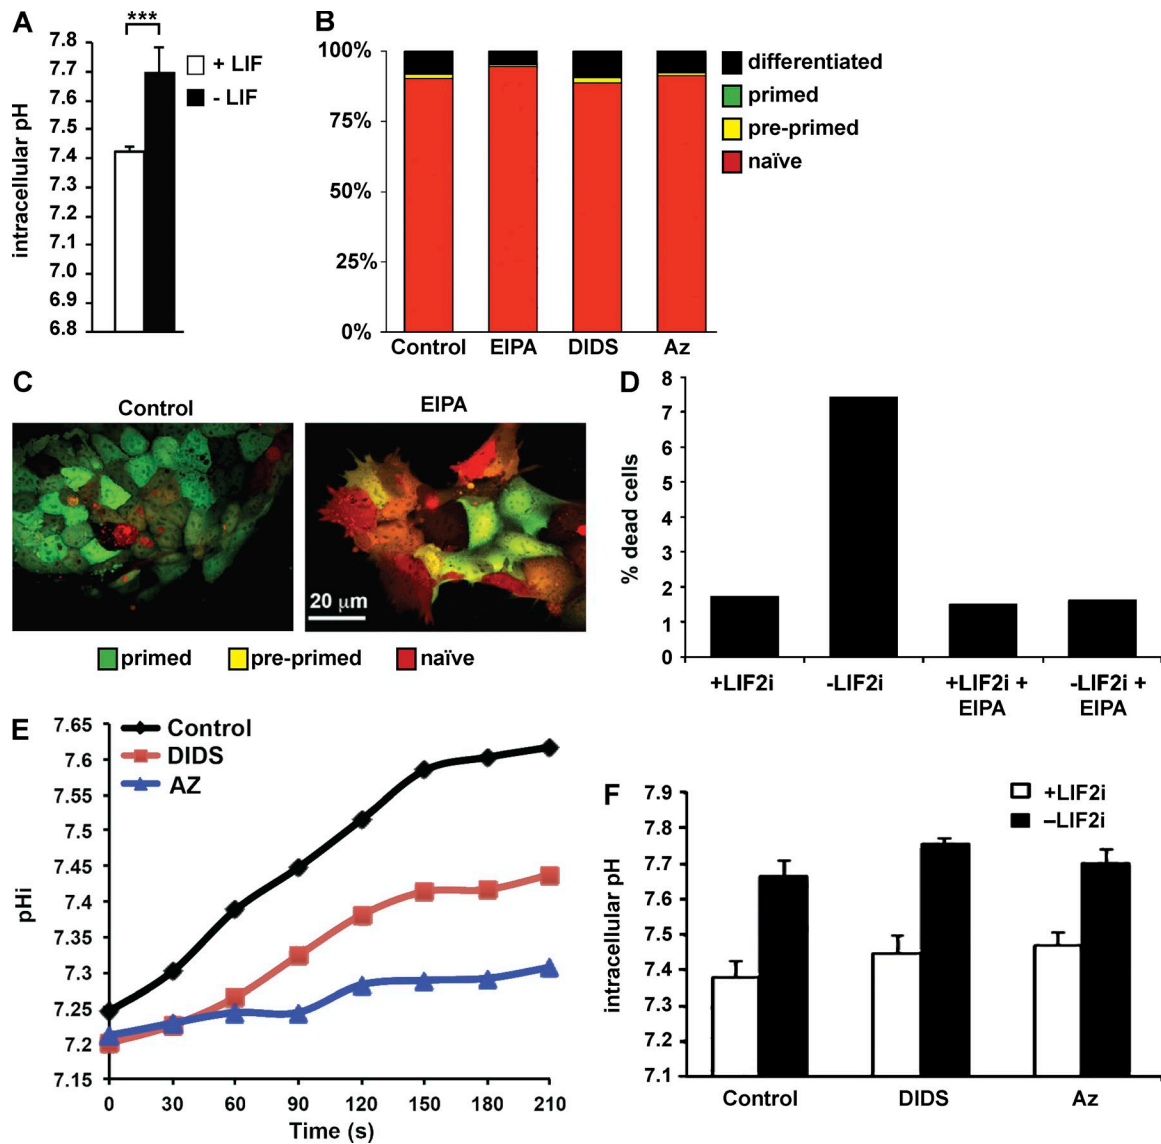

Figure S3. **Additional aspects of the interaction between changes in pHi and mESC differentiation, including lack of an effect of EIPA on cell survival, dual-reporter expression indicating EIPA maintains more cells in a naive state, and increased pHi in differentiating cells being independent of relieving MEK inhibition.** (A) Cells maintained for 2 wk in LIF (without 2i) have increased pHi 48 h after LIF removal. \*\*\*,  $P < 0.001$ . (B) The proportion of naive (*mir-290-mCherry<sup>+</sup>*, *mir-302-eGFP<sup>+</sup>*) dual-reporter cells cultured with LIF2i was not different in the presence of EIPA, DIDS, or Az compared with controls. (C) Images of dual-reporter cells maintained without LIF2i for 5 d show that more cells express *mir-290-mCherry<sup>+</sup>* in the presence versus absence of EIPA. (D) Cell death was measured by flow cytometry as increased DAPI intensity. The percentage of dead cells increased with the removal of LIF2i (1.7 to 7.4%) but did not change with EIPA treatment (1.5% with LIF2i, 1.6% without LIF2i).  $n = 2$  independent cell preparations. (E) DIDS and Az attenuate pHi recovery after rapidly switching cells from a nominally  $\text{HCO}_3^-$ -free HEPES buffer at 0%  $\text{CO}_2$  to a HEPES-free buffer containing 25 mM  $\text{NaHCO}_3$  superfused with 5%  $\text{CO}_2$ . (F) The pHi of cells maintained for 72 h with and without LIF2i was not different in the presence of DIDS or Az compared with controls.

Table S1. Differences in the slope and intercept of the linear regression model using two or three calibration points

| Cell type                    | Intercept | Slope  | r <sup>2</sup> |
|------------------------------|-----------|--------|----------------|
| Two-point calibration        |           |        |                |
| Follicle                     | -6.222    | 1.035  | 0.917          |
| Prefollicle                  | -5.741    | 0.954  | 0.903          |
| Stem                         | -5.785    | 0.954  | 0.852          |
| Three-point calibration      |           |        |                |
| Follicle                     | -6.247    | 1.038  | 0.922          |
| Prefollicle                  | -5.776    | 0.958  | 0.909          |
| Stem                         | -5.685    | -0.945 | 0.867          |
| Three point versus two point |           |        |                |
| Follicle                     | 0.025     | -0.003 | -0.005         |
| Prefollicle                  | 0.035     | -0.004 | -0.006         |
| Stem                         | -0.100    | 0.009  | -0.015         |

Table S2. Summary of the pHi estimates for the wild-type controls in all experiments

| Experiment                  | <i>DNhe2</i> overexpression | <i>DNhe2</i> RNAi       | <i>DNhe2</i> <sup>E358l</sup> overexpression | CG8177 RNAi | Flipout clones           |
|-----------------------------|-----------------------------|-------------------------|----------------------------------------------|-------------|--------------------------|
| Driver                      | FC-Gal4                     | FC-Gal4                 | FC-Gal4                                      | FC-Gal4     | Actin-Gal4               |
| Stem pHi                    | 7.07                        | 6.92                    | 7.04                                         | 7.05        | 6.79                     |
| pFC pHi                     | 7.10                        | 7.14                    | 7.27                                         | 7.22        | 7.03                     |
| FC pHi                      | 7.17                        | 7.09                    | 7.24                                         | 7.25        | 7.27                     |
| Δ pHi (stem versus pFC)     | 0.03                        | 0.21                    | 0.23                                         | 0.17        | 0.25                     |
| P-value for stem versus pFC | 0.58                        | 3.83 × 10 <sup>-3</sup> | 0.01                                         | 0.04        | 4.85 × 10 <sup>-5</sup>  |
| Δ pHi (stem versus FC)      | 0.11                        | 0.17                    | 0.20                                         | 0.21        | 0.48                     |
| P-value for stem versus pFC | 0.06                        | 1.06 × 10 <sup>-3</sup> | 0.03                                         | 0.01        | 3.03 × 10 <sup>-13</sup> |
| n (germaria)                | 20                          | 16                      | 19                                           | 17          | 36                       |
